# Supplementary material
Source: Springer Nature journal article supplement (https://www.springermedizin.de/resource/supplementary/12986_2010_294_MOESM2_ESM.pdf/25655778)

**A.****TG-AUC in 7 obese postmenopausal women  
(mmolx14h)**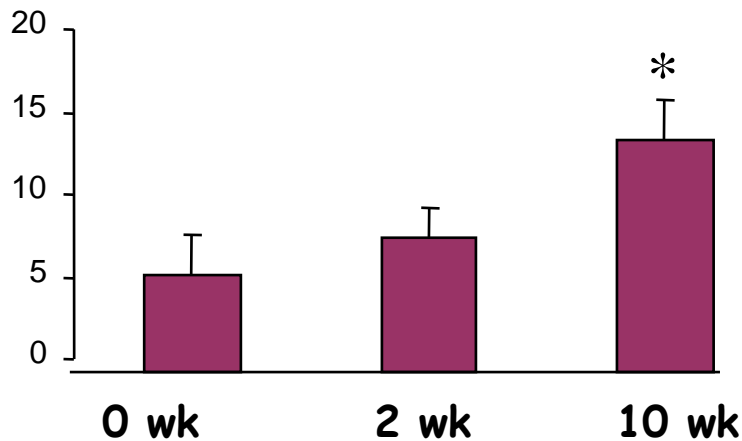**B. Mean 24-h TG (mg/dl)**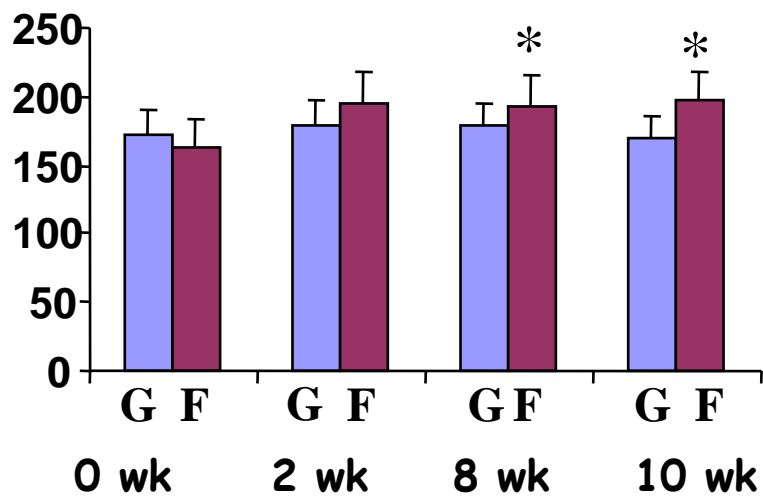**C. TG AUC (mg/dl.23h)**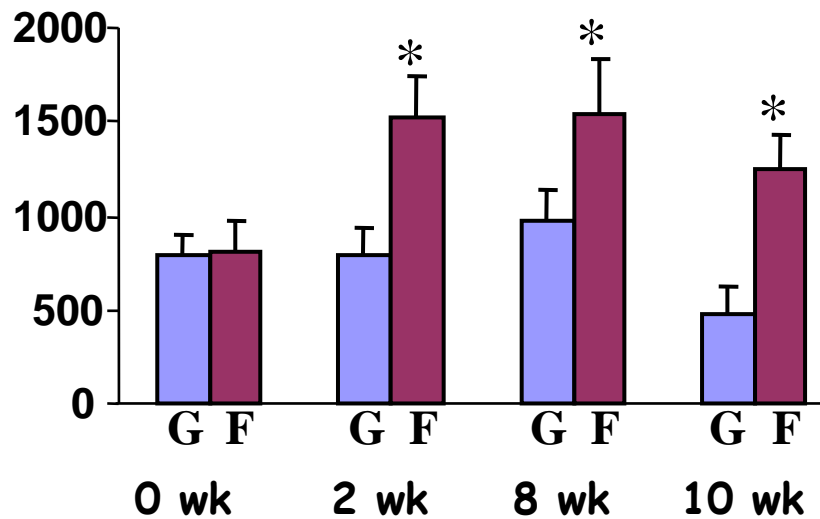

Supplement: MOESM2 [file 25655778]
